**Title:** Heterogeneity in risk, testing and outcome of COVID-19 across outbreak settings in the Greater Toronto Area, Canada: an observational study

**Authors:** Linwei Wang, MSc<sup>1</sup>, Huiting Ma, MSc<sup>1</sup>, Kristy C.Y. Yiu, MSc<sup>1</sup>, Andrew Calzavara, MSc<sup>2</sup>, David Landsman, BSc<sup>1</sup>, Linh Luong, MPH<sup>1</sup>, Adrienne K. Chan, MD, MPH<sup>3,4</sup>, Rafal Kustra, PhD<sup>5</sup>, Jeffrey C Kwong, MD, MSc<sup>2,6</sup>, Marie-Claude Boily, PhD<sup>7</sup>, Stephen Hwang, MD, MPH<sup>1,8</sup>, Sharon Straus, MD, MSc<sup>9</sup>, Stefan D Baral, MD<sup>10</sup>, Sharmistha Mishra, MD, PhD<sup>1,3</sup>

**Affiliations:** <sup>1</sup>MAP Centre for Urban Health Solutions, St. Michael's Hospital, University of Toronto, Toronto, Canada; <sup>2</sup>ICES, Toronto, Canada; <sup>3</sup>Division of Infectious Diseases, Department of Medicine, University of Toronto, Toronto, Canada; <sup>4</sup>Division of Infectious Diseases, Sunnybrook Health Sciences, University of Toronto, Toronto, Canada; <sup>5</sup>Dalla Lana School of Public Health, University of Toronto, Toronto, Canada; <sup>6</sup>Department of Family and Community Medicine, Faculty of Medicine, University of Toronto, Toronto, Canada; <sup>7</sup>Department of Infectious Disease Epidemiology, Faculty of Medicine, Imperial College, London, United Kingdom; <sup>8</sup>Division of General Internal Medicine, Department of Medicine, University of Toronto, Toronto, Canada; <sup>9</sup>Department of Medicine, St. Michael's Hospital, University of Toronto, Toronto, Canada; <sup>10</sup>Bloomberg School of Public Health, Johns Hopkins University, Baltimore, MD, United States

**Corresponding author:**

Sharmistha Mishra, MD, PhD  
Email: [sharmistha.mishra@utoronto.ca](mailto:sharmistha.mishra@utoronto.ca)

**Word count:** 2500/2500

**Tables:** 1

**Figures:** 3

**Last updated:** June 12<sup>th</sup>, 2020

**Funding:** The work was supported by the Canadian Institutes of Health Research Foundation Grant (FN 13455), the Ontario Early Researcher Award (ER17-13-043), and the St. Michael's Hospital Foundation Research Innovation Council's 2020 COVID-19 Centre Research Award.

**Declaration of competing interests:** The authors have no competing interests to declare.

## Abstract

**Background:** We compared the risk of, testing for, and death following COVID-19 infection across three settings (long-term care homes (LTCH), shelters, the rest of the population) in the Greater Toronto Area (GTA), Canada.

**Methods:** We sourced person-level data from COVID-19 surveillance and reporting systems in Ontario, and examined settings with population-specific denominators (LTCH residents, shelters, and the rest of the population). We calculated cumulatively, the diagnosed cases per capita, proportion tested for COVID-19, daily and cumulative positivity, and case fatality proportion. We estimated the age- and sex-adjusted relative rate ratios for test positivity and case fatality using quasi-Poisson regression.

**Results:** Between 01/23/2020-05/25/2020, we observed a shift in the proportion of cases: from travel-related and into LTCH and shelters. Cumulatively, compared to the rest of the population, the number of diagnosed cases per 100,000 was 59-fold and 18-fold higher among LTCH and shelter residents, respectively. By 05/25/2020, 77.2% of LTCH residents compared to 2.4% of the rest of the population had been tested. After adjusting for age and sex, LTCH residents were 2.5 times (95% confidence interval (CI): 2.3-2.8) more likely to test positive. Case fatality was 26.3% (915/3485), 0.7% (3/402), and 3.6% (506/14133) among LTCH residents, shelter population, and others in the GTA, respectively. After adjusting for age and sex, case fatality was 1.4-fold (95%CI: 1.1-1.9) higher among LTCH residents than the rest of the population.

**Interpretation:** Heterogeneity across micro-epidemics among specific populations in specific settings may reflect underlying heterogeneity in transmission risks, necessitating setting-specific COVID-19 prevention and mitigation strategies.

## Introduction

Globally as of May 25, 2020, 5.4 million people have been diagnosed with COVID-19, of whom 345,000 have died (1). In Canada, 85,0000 people have been diagnosed with COVID-19, including 6,000 people who have died (1). Across North America, large urban centres such as the Greater Toronto Area (GTA) have borne the highest burden of cases (2). By May 25, 18,020 cases of COVID-19 had been diagnosed in the GTA's population of six million people (2), accounting for over two-thirds of all cases in Ontario, and 21.4% of national cases (1, 2).

Congregate living settings have been disproportionately affected in past respiratory outbreaks (3). Settings such as long term care homes (LTCH) and homeless shelters are vulnerable partly due to design barriers (e.g. shared living quarters and communal spaces) to physical distancing, and under-resourcing of infection prevention and control measures (4-8). COVID-19 outbreaks in congregate settings have been similarly observed globally (9) and across Canada (10-13). For example, 416 of 630 LTCH in Ontario, excluding retirement homes, have had a COVID-19 outbreak (12), and 14 of 53 shelters in the City of Toronto are in active outbreak as of June 4<sup>th</sup> (13).

Lessons learned from past epidemics suggest that disproportionate risks across settings contribute to the spread and outcomes of infection (14). Thus, a key feature of an epidemic response is quantifying heterogeneity in 'what has happened' with respect to disproportionate risks, a process often referred to as an epidemic appraisal (15, 16). We characterized, using the best available data sources, heterogeneity over time in testing (proportion tested), risk (diagnosed cases per capita, testing positivity), and outcome (death) following COVID-19 diagnosis in the GTA across three settings with available population-size data: LTCH residents, persons using shelters, and the rest of the population.

## Methods

### *Study setting*

We defined the GTA as the City of Toronto, York, Peel, Halton and Durham public health units (13, 17-20).

### *Data sources*

We sourced COVID-19 surveillance and reporting systems for information on the number of laboratory-confirmed cases (2), testing and results (21), and death (2). Data were obtained through May 25, 2020, four months after the first case of COVID-19 in the GTA (January 23)(2). We used person-level data in our analyses (2, 21); and cross-checked estimates for LTCH residents against aggregate data from the provincial LTCH tracker which reports a daily census of LTCH residents with confirmed and probable COVID-19 and deaths (12).

### The integrated Public Health Information System (iPHIS)

iPHIS is the provincial reportable diseases of confirmed and probable cases (2). Each public health unit submits person-level data to iPHIS, including the date of case report to public health; outcomes (e.g. death); case acquisition; demographics (sex, age) (2); and an outbreak-ID if the case was related to an outbreak in congregate settings (22, 23). A subset of iPHIS data (confirmed cases only; age-group instead of age in years) were made available by the Ontario Ministry of Health to the Ontario Modeling Consensus Table and used for these analyses.

### Ontario Laboratories Information System (OLIS)

OLIS contains data on COVID-19 tests submitted from hospitals, commercial laboratories, the provincial public health laboratory, and including testing at the COVID-19 assessment centres (21). OLIS includes test-level (date, result), and person-level (sex, age, address) data. Patient addresses were used to classify cases in the GTA and residents of LTCH. OLIS data were linked to records of emergency department visits and hospital admissions. Individuals with a record of emergency department visit or hospital admission in the past year and with an 'homelessness' indicator at the time of the service were identified as persons who may use shelters (24). These datasets were linked using unique encoded identifiers and analyzed at ICES (25).

Cross-checks identified the following: as of May 25, OLIS captured 90%, 96%, and 24% of confirmed cases in the GTA among overall population, LTCH residents, and persons using shelters, respectively, compared to iPHIS data (**Appendix-1 Figure-1A-C**). iPHIS recorded 915 deaths among LTCH residents with laboratory-confirmed COVID-19 versus 1032 recorded in the provincial LTCH tracker (**Appendix-1 Figure-1D**); the latter includes residents diagnosed with COVID-19 at time of death and thus may not yet be recorded in iPHIS.

### Population-specific denominators

We estimated the population of LTCH residents using the total LTCH bed capacity in the GTA, assuming complete occupancy (12). The population denominator for persons using shelters was sourced from the literature (26-33) (**Appendix-2**). To estimate the size of the rest of the population, we subtracted the above estimates from census-derived GTA population size (34).

### *Statistical analyses*

First, we calculated the cumulative and daily number and proportion of diagnosed cases over time in mutually exclusive categories in iPHIS: congregate settings (LTCH residents, staff, or other [e.g., volunteers], shelters, other congregate outbreak settings [hospitals, correctional facilities, retirement homes, group homes, and others not yet classified such as workplaces]; travel-related; and community settings (with versus without epidemiological link). Cases with missing information on setting excluded congregate settings.

Second, we examined differences in the three settings for which we had data on the population size (LTCH residents, persons using shelters, and the rest of the population): cumulative diagnosed cases per capita, cumulative proportion of population tested for COVID-19, daily and cumulative proportion of tests that were positive, and the cumulative case fatality proportion.

Third, we compared the age and sex distributions of diagnosed cases, proportion tested for COVID-19, and case fatality across the three settings using chi-squared tests. We used quasi-Poisson regression models (35) to estimate test positivity rate ratio, and case fatality rate ratio with 95% confidence intervals (CIs) among LTCH residents, and persons using shelters, separately, compared to the rest of the population; and adjusting for age (<50/50-59/60-69/70-70/80 years and older) and sex.

We used R version 3.6.3 (36) for data cleaning and analyses.

## Results

### *Distribution in diagnoses over time across settings*

By May 25, there were 18,020 diagnosed cases (263 cases per 100,000 population) in the GTA (**Figure-1A**), with 250-350 newly diagnosed cases per day in the week prior to May 25 (**Appendix-1 Figure-2A**). Diagnosed cases with a known travel history accounted for more than 95% of cases prior to March 7 (**Figure-1B, Appendix-1 Table-1**). By May 25, 41.6% of cumulative cases were diagnosed in congregate settings and 58.4% were diagnosed outside congregate settings, including 3.8% travel-related, 37.8% in community settings (18.5% with or 19.3% without an epidemiological link or close contact), and 16.8% with missing information (**Figure-1B, Appendix-1 Table-1**). Proportions of daily new diagnoses by setting over time are shown in **Appendix-1 Figure-2B and Appendix-1 Table-1**: on May 25<sup>th</sup>, 15.4% of new diagnoses were in congregate settings, 0.6% were travel-related, 76.8% were in community settings, and 7.3% with missing information.

In March, diagnoses transitioned from predominantly travel-related to community settings. By the end of March, 28.5% of cumulative cases were travel-related, 48.6% were in community settings, and 10.3% were in the congregate outbreak settings (**Figure-1B**). A sharp increase in cases in congregate settings, particularly among LTCH residents followed in April. From April 1 to April 20, the proportion of cumulative cases increased in each congregate setting: LTCH residents (from 4.1% to 23.3%); LTCH staff (from 2.8% to 5.7%); persons using shelters (from 0% to 2.4%); and in other congregate settings (from 4.0% to 10.9%). The cumulative proportion of cases in congregate settings remained relatively stable thereafter (**Figure-1B**).

Of all cases in congregate settings by May 25, nearly half (46.5%) were among LTCH residents, and 5.4% were among persons using shelters (**Appendix-1 Figure-3**). **Appendix-1 Figure-3 and Appendix-1 Table-1** show the distribution and number of diagnoses by type of congregate setting. The sex and age distribution of cases among LTCH residents, in shelters, and among the rest of the population varied considerably (**Table-1**). Compared to the diagnosed cases in the rest of the population, LTCH residents diagnosed with COVID-19 were older (74.7% aged 80 years or more vs. 7.2%,  $p < 0.001$ ) and more likely to be a female (66.4% vs. 53.2%,  $p < 0.001$ ); while persons using shelters and diagnosed with COVID-19 were younger (71.3% aged less than 50 years vs. 52.4%,  $p < 0.001$ ) and less likely to be a female (41.6% vs. 53.2%,  $p < 0.001$ ) (**Table-1**).

### *Cumulative diagnoses per capita by setting*

Cumulative diagnoses per capita by setting over time are shown in **Figure-2**. Cumulative diagnosed cases per 100,000 population were 59-fold and 18-fold higher among LTCH residents (12308), and persons using shelters (3797), respectively, compared to the rest of the population (208) (**Table-1**).

### *Per-capita testing volume and positivity rate*

By May 25, 77.2% of LTCH residents and 13.9% of persons using shelters had been tested at least once, compared to 2.4% of the rest of the population (**Table-1** ; **Appendix-1 Figure-4**).

Cumulative test positivity was: 15.3% (LTCH residents), 4.8% (persons using shelters), and 6.7% (rest of the population). Among those tested, the age and sex-adjusted test positivity rate ratio was 2.5 (95% CI: 2.3-2.8) among LTCH residents, and 0.8 (95% CI: 0.5-1.1) among persons using shelters, compared to the rest of the population (**Table-1**; **Figure-3A**).

LTCH residents' test positivity changed over time with varying testing volume: the daily new testing positivity proportion spiked in early April, with 20%-60% of LTCH residents testing positive each day (**Figure-3B**). After April 20, and as per-capita testing volumes rose, test positivity among LTCH residents fell to 10%, similar to positivity in the rest of the population (**Figure-3B**). Test positivity among LTCH residents re-spiked in mid-May with fewer tests (**Figure-3B**).

### *Case fatality proportion*

As of May 25, 915 (64.3%), 3 (0.2%) and 506 (35.5%) deaths were reported among LTCH residents, persons using shelters, and the rest of the population, reflecting a case fatality proportion of 26.3%, 0.7%, and 3.6%, respectively (**Table-1**). The age- and sex-adjusted case fatality rate was 1.4 times (95% CI: 1.1-1.9) higher among LTCH residents compared with the rest of the population (**Table-1**).

## Interpretation

Diagnosed cases of COVID-19 in the GTA have shifted from travel-related, through the community, and are now divided between outbreaks in congregate settings such as LTCH and shelters and community settings. Congregate settings represent a disproportionate risk of cases, and in the context of LTCH residents, higher case-fatality among those diagnosed.

The time-course of the micro-epidemics within a large city such as the GTA raise questions about how transmission may have moved through physical (and thus, social) networks defined along intersections of architectural, occupation, and socio-economic factors. LTCH were quick (on March 14<sup>th</sup>, 2020) to close visitations (37-39) and thus connections between residents and the wider community were largely limited to LTCH staff and volunteers. Meanwhile, early (in early March) efforts to implement enhanced infection control practices, screening, triage, and a temporary housing strategy for persons experiencing homelessness and who were awaiting test results may also have delayed the onset of outbreaks in shelters (40, 41). Neighborhood-level measures of marginalization suggest that it also took time for the virus to spread via travel in the context of higher-income social and physical networks than through lower socio-economic networks and households where physical distancing may be limited by high density-dwellings (42-44). Some community cases may reflect close contacts or an epidemiological link with congregate settings; for example, as members of households of persons who work or volunteer in facilities and essential workplaces (45, 46). Thus, alongside the overall reductions in outdoor and between-household contacts in the community (47), the overall GTA epidemic may have now concentrated in congregate settings and in community households, with additional work needed to discern connections between networks.

The size and trajectory in the per-capita rate of diagnosed among LTCH residents and among persons using shelters could reflect underlying differences in testing and/or to differential vulnerabilities to outbreaks. After the initial LTCH outbreaks were detected in late March, Ontario instituted a wider scope for testing in LTCH – including asymptomatic residents (48) – which led to a surge in cases identified through this point-prevalence approach to outbreak investigations (49). Declines thereafter in the LTCH residents' positivity rate may reflect a combination of: infections averted; surge in testing already diagnosed the most vulnerable; an effective shield or herd immunity achieved within facilities (deaths among existing residents and without new admissions means fewer susceptible residents for an outbreak to persist) (50). The higher positivity rate in late May among LTCH residents with a smaller tested proportion may suggest more targeted testing during this latter period.

The 2.5-fold higher cumulative positivity among LTCH residents, after adjustment for age and sex, suggests a combination of: higher risk transmission environments or differences in testing practices and criteria for LTCH residents versus the rest of the GTA population. For example, observed cases may reflect a higher proportion of asymptomatic infection among LTCH residents, because until May 24<sup>th</sup>, the criteria for testing outside the context of congregate settings were more risk-based (symptoms, epidemiological link or close contact/exposures) (51-53).



Finally, death among LTCH residents diagnosed with COVID-19 accounted for approximately two thirds of deaths among all diagnosed cases in the GTA, similar to Ontario overall, British Columbia, and Québec (54-56). A higher age- and sex-adjusted case fatality rate among LTCH residents as compared with the rest of the population may reflect underlying differences in comorbidities associated with COVID-attributable mortality and/or goals of care (57). Our findings suggest that the 13-fold higher COVID-related mortality among LTCH residents as compared with all non-LTCH elders in Ontario (58), could stem from both the higher risk of infection and rates of COVID-19 diagnoses, and a higher case fatality among LTCH residents diagnosed with COVID-19.

There are important limitations to note. First, we were limited to quantifying disproportionate risks to sub-populations on whom we could obtain data on the population size denominators (as such, e.g., we could not estimate diagnoses per capita for LTCH staff and for retirement homes). Future work in epidemic appraisal necessitates population size and per-capita estimates across each type of outbreak setting, and additional disaggregation that are now being collected (ethnicity, social-economic status, comorbidities) as part of the person-level data (59-61). Second, 'rest of the population' subsumed other congregate facilities, and thus our estimates of the relative difference in per-capita testing and positivity may be an underestimate as other congregate facilities are known to be associated with more testing (e.g. hospitals (52, 53) and risk of outbreaks (62)). Third, we assumed that the population denominators for each outbreak setting were mutually exclusive and static. However, during the course of epidemic, there could be shifts in setting-specific population size (e.g., LTCH residents may have moved to home; . although new admissions to LTCH were halted during the outbreak (63), there was an active strategy to support housing at LTCH for older adults who were underhoused (64). Fourth, the large underestimate in the OLIS data, of persons experiencing homelessness and diagnosed with COVID-19 (**Appendix-1 Figure-1C**) suggests the proportion tested and test positivity among persons experiencing homelessness may be a large underestimate, and thus must be interpreted with caution.

Heterogeneity across micro-epidemics signal the need for setting-specific and population-specific strategies in the next phase of the public health response in Canada, which could be guided by next steps of work including modeling the risks of onward transmission across each layer of heterogeneity and connections between networks.

**Acknowledgements:** Reported COVID-19 cases were obtained from the Public Health Ontario (PHO) integrated Public Health Information System (iPHIS), via the Ontario COVID-19 Modelling Consensus Table, and with approval from the University of Toronto Health Sciences REB (protocol No. 39253). This Ontario Laboratories Information System (OLIS) data and linkages were supported by ICES, which is funded by an annual grant from the Ontario Ministry of Health and Long-Term Care (MOHLTC). Parts of this material are based on data and information compiled and provided by MOHLTC and the Canadian Institute for Health Information (CIHI). The analyses, conclusions, opinions and statements expressed herein are solely those of the authors and do not reflect those of the funding or data sources; no endorsement is intended or should be inferred.

## References

1. Worldometer. COVID-19 coronavirus pandemic 2020. <https://www.worldometers.info/coronavirus/>. (2020 May 25, date last accessed)
2. Government of Ontario. Confirmed positive cases of COVID19 in Ontario [Internet]. 2020. Available from: <https://data.ontario.ca/dataset/confirmed-positive-cases-of-covid-19-in-ontario/resource/455fd63b-603d-4608-8216-7d8647f43350>.
3. MacFadden DR, McGeer A, Athey T, Perusini S, Olsha R, Li A, et al. Use of genome sequencing to define institutional influenza outbreaks, Toronto, Ontario, Canada, 2014-15. *Emerg Infect Dis* 2018;24(3):492-7.
4. Lee MH, Lee GA, Lee SH, Park YH. A systematic review on the causes of the transmission and control measures of outbreaks in long-term care facilities: back to basics of infection control. *PLoS One* 2020;15(3):e0229911.
5. Levin-Rector A, Nivin B, Yeung A, Fine AD, Greene SK. Building-level analyses to prospectively detect influenza outbreaks in long-term care facilities: New York City, 2013-2014. *Am J Infect Control* 2015;43(8):839-43.
6. Baggett TP, Keyes H, Sporn N, Gaeta JM. Prevalence of SARS-CoV-2 infection in residents of a large homeless shelter in Boston. *JAMA* 2020:Epub ahead of print.
7. Tsai J, Wilson M. COVID-19: a potential public health problem for homeless populations. *Lancet Public Health* 2020;5(4):e186-e7.
8. Culhane DP, Treglia D, Steif K, Kuhn R, Byrne T. Estimated emergency and observational/quarantine capacity need for the US homeless population related to COVID-19 exposure by county; projected hospitalizations, intensive care units and mortality. University of Pennsylvania; 2020 Apr 3 [https://works.bepress.com/dennis\\_culhane/237/](https://works.bepress.com/dennis_culhane/237/).
9. Leclerc QJ, Fuller NM, Knight LE, CMMID COVID-19 Working Group, Funk S, Knight GM. What settings have been linked to SARS-CoV-2 transmission clusters? . *Wellcome Open Research* 2020.
10. Pelley L. More than 80 Toronto health-care facilities, shelters experiencing COVID-19 outbreaks. CBC News. 2020 18 Apr 2020. Available from: <https://www.cbc.ca/news/canada/toronto/more-than-80-toronto-health-care-facilities-shelters-experiencing-covid-19-outbreaks-1.5536867>.
11. Bensadoun E. Nearly half of Canada's COVID-19 deaths linked to long-term care facilities: Tam. Global News. 2020 13 Apr 2020. Available from: <https://globalnews.ca/news/6811726/coronavirus-long-term-care-deaths-canada/>.
12. Ontario Ministry of Long-Term Care. NIA long term care COVID-19 tracker 2020. <https://ltc-covid19-tracker.ca/>. (2020 Jun 5, date last accessed)
13. City of Toronto. COVID-19: status of cases in Toronto 2020. <https://www.toronto.ca/home/covid-19/covid-19-latest-city-of-toronto-news/covid-19-status-of-cases-in-toronto/>. (2020 Jun 5, date last accessed)
14. Lloyd-Smith JO, Schreiber SJ, Kopp PE, Getz WM. Superspreading and the effect of individual variation on disease emergence. *Nature* 2005;438:355-9.
15. Wilson D, Halperin DT. "Know your epidemic, know your response": a useful approach, if we get it right. *Lancet* 2008;372:423-6.
16. Blanchard JF, Aral SO. Program Science: an initiative to improve the planning, implementation and evaluation of HIV/sexually transmitted infection prevention programmes. *Sex Transm Infect* 2011;87(1):2-3.
17. Durham Region. COVID-19 update 2020. <https://www.durham.ca/en/health-and-wellness/novel-coronavirus-update.aspx>.
18. Halton Region. COVID-19 (2019 novel coronavirus) 2020. <https://www.halton.ca/For-Residents/Immunizations-Preventable-Disease/Diseases-Infections/New-Coronavirus>.

19. Region of Peel. Novel coronavirus (COVID-19) 2020. <https://www.peelregion.ca/coronavirus/>.
20. York Region. COVID-19 2020. [https://www.york.ca/wps/portal/yorkhome/health/yr/covid-19/covid19inyorkregion/01covid19inyorkregion/!ut/p/z1/tVXRcqlwFP2WffCRyU1AkzxmWSvQim5brebFYREhWwFLU61\\_v7GID-20MDsWHkKSOTn33pM7J0iiBZJFtFdppFVZRFuzXsrByhcj3\\_MulZg4zAUBExEQymDIMbp7ARDiDDzsQgDehIF\\_Qaf9X8zDcEmQbD4\\_RxLJXazWaEnshLKYM4tCP7acKB5YHP9Zm4Fv-pxvIm7wBh0XeqcztDxWq7gsdFLohHzL6t4sHrXSTy8bWZknZkyirc56EJd7tbYwr2eYq-J0okpSU2YPAH-yXZfWkPupNPjiE1CfbwDINmllWwj5nmN0wxzw5wEVczwBx7drQMP1LE2S9Mssrgm626vkgZFWwWmH27-87o8aluAz4zQQm93Sk-hW3rSLf33iBP44GJxaj97aIMgvst-2gELw261D7vVPuxW-7Dbvp-fk07Q5k7mZSDV2B2nhjSmaWKTYkWb0Zbzz446uJzozVU6u\\_DgxTG20-G\\_qzRomtzf5WPMld4YgRTuJ1R-D2kDhtcjadXZ7vSLp\\_lzD4q6\\_6aHW43WZqvXkO73\\_TbpkwbrPjxDzbgwMq!/dz/d5/L2dBISEvZ0FBIS9nQSEh/#.XsqHoDpKhPY](https://www.york.ca/wps/portal/yorkhome/health/yr/covid-19/covid19inyorkregion/01covid19inyorkregion/!ut/p/z1/tVXRcqlwFP2WffCRyU1AkzxmWSvQim5brebFYREhWwFLU61_v7GID-20MDsWHkKSOTn33pM7J0iiBZJFtFdppFVZRFuzXsrByhcj3_MulZg4zAUBExEQymDIMbp7ARDiDDzsQgDehIF_Qaf9X8zDcEmQbD4_RxLJXazWaEnshLKYM4tCP7acKB5YHP9Zm4Fv-pxvIm7wBh0XeqcztDxWq7gsdFLohHzL6t4sHrXSTy8bWZknZkyirc56EJd7tbYwr2eYq-J0okpSU2YPAH-yXZfWkPupNPjiE1CfbwDINmllWwj5nmN0wxzw5wEVczwBx7drQMP1LE2S9Mssrgm626vkgZFWwWmH27-87o8aluAz4zQQm93Sk-hW3rSLf33iBP44GJxaj97aIMgvst-2gELw261D7vVPuxW-7Dbvp-fk07Q5k7mZSDV2B2nhjSmaWKTYkWb0Zbzz446uJzozVU6u_DgxTG20-G_qzRomtzf5WPMld4YgRTuJ1R-D2kDhtcjadXZ7vSLp_lzD4q6_6aHW43WZqvXkO73_TbpkwbrPjxDzbgwMq!/dz/d5/L2dBISEvZ0FBIS9nQSEh/#.XsqHoDpKhPY).
21. Chung H, Fung K, Ferreira-Legere LE, Chen B, Ischiguro L, Kalappa G, et al. COVID-19 laboratory testing in Ontario: patterns of testing and characteristics of individuals tested, as of April 30, 2020. Toronto: ICES; 2020. <https://www.ices.on.ca/Publications/Atlases-and-Reports/2020/COVID-19-Laboratory-Testing-in-Ontario>.
22. City of Toronto. Active COVID-19 outbreaks in Toronto shelters. 2020. <https://www.toronto.ca/home/covid-19/covid-19-latest-city-of-toronto-news/covid-19-status-of-cases-in-toronto/>.
23. City of Toronto. Active outbreaks in retirement homes and hospitals. 2020. <https://www.toronto.ca/home/covid-19/covid-19-latest-city-of-toronto-news/covid-19-status-of-cases-in-toronto/>.
24. Richard L, Hwang SW, Forchuk C, Nisembaum R, Clemens K, Wiens K, et al. Validation study of health administrative data algorithms to identify individuals experiencing homelessness and estimate population prevalence of homelessness in Ontario, Canada. *BMJ Open* 2019;9(10):e030221.
25. Institute for Clinical Evaluative Sciences. About ICES 2020. <https://www.ices.on.ca/About-ICES>.
26. Halton Region. Halton region's point in time count - 2018 dashboard. 2019. <https://www.homelesshub.ca/sites/default/files/attachments/SS-03-19%20Attachment%20%234%20Point%20In%20Time%20Dashboard.pdf>.
27. Community Development Halton. Homelessness in Halton (revised) 2019. <https://www.homelesshub.ca/CommunityProfiles>. (2020 Apr 3, date last accessed)
28. York Region. I count: York Region's 2018 homeless count. 2019. <https://www.homelesshub.ca/sites/default/files/attachments/Working%2BTogether%2Bto%2BPrevent%2BReduce%2BAnd%2BEnd%2BHomelessness%2Bin%2BYork%2BRegion.pdf>.
29. Region of Peel, Peel Alliance to End Homelessness. Everyone counts Peel: 2018 joint point-in-time count and registry week results. 2019. <https://www.homelesshub.ca/sites/default/files/attachments/Final%20Report.pdf>.
30. Community Development Council Durham, Durham Mental Health Services. Durham 2018 pit count report. 2019. [https://www.homelesshub.ca/sites/default/files/attachments/PROOF3\\_2018PIT\\_Report\\_CDCCD-1.pdf](https://www.homelesshub.ca/sites/default/files/attachments/PROOF3_2018PIT_Report_CDCCD-1.pdf).
31. City of Toronto. Toronto street needs assessment 2018. 2018. <https://www.toronto.ca/wp-content/uploads/2018/11/99be-2018-SNA-Results-Report.pdf>.
32. York Region. Emergency and transitional housing 2020. [https://www.york.ca/wps/portal/yorkhome/support/yr/housing/emergencyandtransitionalhousing/!ut/p/z0/hY7BDolwEES\\_xQNHsw0xwrUhrKAJV-yFVKxQkW1pi8rfi2g86m3e7OzuAIMCGPKbrLmTCv14gNblwndJnG8I2m-CiNCSU5TPwjZh9ACux3YLogL33PKLBKoRMPB8Voylmj88ioTDuBddlns9GoTnjEDI](https://www.york.ca/wps/portal/yorkhome/support/yr/housing/emergencyandtransitionalhousing/!ut/p/z0/hY7BDolwEES_xQNHsw0xwrUhrKAJV-yFVKxQkW1pi8rfi2g86m3e7OzuAIMCGPKbrLmTCv14gNblwndJnG8I2m-CiNCSU5TPwjZh9ACux3YLogL33PKLBKoRMPB8Voylmj88ioTDuBddlns9GoTnjEDI). (2020 Apr 3, date last accessed)

33. Peel Region. Find a shelter - Region of Peel 2020. <https://www.peelregion.ca/housing/shelters/> (2020 Apr 3, date last accessed)
34. Statistics Canada. Estimates of population (2016 Census and administrative data), by age group and sex for July 1st, Canada, provinces, territories, health regions (2018 boundaries) and peer groups 2020. <https://www150.statcan.gc.ca/t1/tb1/en/cv.action?pid=1710013401#timeframe>.
35. Cameron AC, Trivedi PK. Regression analysis of count data book - second edition, May 2013. Cambridge, UK: Cambridge University Press; 2013.
36. R Core Team. R: a language and environment for statistical computing. Vienna, Austria: R Foundation for Statistical Computing;; 2017.
37. Kennedy B. Visits to long-term care homes and other facilities restricted due to COVID-19. Toronto Star. 2020 14 Mar 2020. Available from: <https://www.thestar.com/news/gta/2020/03/14/visits-to-long-term-care-homes-and-other-facilities-restricted-due-to-covid-19.html>.
38. Rocca R. Ban non-essential visits to long-term care homes during coronavirus pandemic: Ontario chief medical officer. Global News. 2020 14 Mar 2020. Available from: <https://globalnews.ca/news/6677922/coronavirus-ban-non-essential-visits-ontario-long-term-care-homes/>.
39. Ontario Ministry of Health. COVID-19 outbreak guidance for long-term care homes (LTCH) Version 2 - 15 Apr 2020 ed2020.
40. CBC News. Toronto reports 2nd COVID-19-related death in its shelter system. CBC News. 2020 2020 May 13. Available from: <https://www.cbc.ca/news/canada/toronto/covid-19-toronto-may-13-1.5567430>.
41. City of Toronto. Backgrounder: City of Toronto COVID-19 response for people experiencing homelessness 2020. <https://www.toronto.ca/home/media-room/backgrounders-other-resources/backgrounder-city-of-toronto-covid-19-response-for-people-experiencing-homelessness/>.
42. Allen K. As Toronto COVID-19 hotspot maps show an unequal toll, Ontario has yet to start collecting income and race data. Toronto Star. 2020 2020 May 28. Available from: <https://www.thestar.com/news/gta/2020/05/28/as-toronto-covid-19-hotspot-maps-show-an-unequal-toll-ontario-has-yet-to-start-collecting-income-and-race-data.html>.
43. Public Health Ontario. COVID-19 - What we know so far about...social determinants of health. 2020 2020 May 24. <https://www.publichealthontario.ca/-/media/documents/ncov/covid-wwksf/2020/05/what-we-know-social-determinants-health.pdf?la=en>.
44. #HowMyFlattening 2020. <https://howmyflattening.ca/#/home>.
45. Luo Y, Trevathan E, Qian Z, Li Y, Li J, Xiao W, et al. Asymptomatic SARS-CoV-2 infection in household contacts of a healthcare provider, Wuhan, China. *Emerg Infect Dis* 2020;26(8).
46. Pelley L. A healthcare worker got COVID-19 and survived — then lost her partner of 40 years to the illness. CBC News. 2020 2020 Jun 8. Available from: <https://www.cbc.ca/news/canada/toronto/a-healthcare-worker-got-covid-19-and-survived-then-lost-her-partner-of-40-years-to-the-illness-1.5602216>.
47. Soucy J-PR, Sturrock SL, Berry I, Daneman N, MacFadden DR, Brown KA. Estimating the effect of physical distancing on the COVID-19 pandemic using an urban mobility index. *medRxiv* 2020.
48. Government of Ontario. COVID-19 action plan: long-term care homes 2020. Version 1 - 15 Apr 2020: [<https://www.ontario.ca/page/covid-19-action-plan-long-term-care-homes>].
49. Ferguson R. Ontario's COVID-19 deaths top 1,200. Toronto Star. 2020 2020 May 1 Available from: <https://www.thestar.com/politics/provincial/2020/05/01/ontario-hits-new-daily-high-for-covid-19-tests.html>.
50. Gomes MGM, Corder RM, King JG, Langwig KE, Souto-Maior C, Carneiro J, et al. Individual variation in susceptibility or exposure to SARS-CoV-2 lowers the herd immunity threshold [preprint]. *medRxiv* 2020.

51. Farooqui S. Coronavirus: Doug Ford says anyone who wants a COVID-19 test in Ontario will be able to get one. Global News. 2020 2020 May 24. Available from: <https://globalnews.ca/news/6980167/coronavirus-ontario-testing-anyone-covid-19/>.
52. Ministry of Health GoO. COVID-19 provincial testing guidance update, version 6.0. 2020.
53. Ministry of Health GoO. COVID-19 quick reference public health guidance on testing and clearance, version 7.0. 2020.
54. Government of Ontario. How Ontario is responding to COVID-19 2020. <https://www.ontario.ca/page/how-ontario-is-responding-covid-19#section-0>.
55. Centre d'expertise et de référence en santé publique. Données COVID-19 au Québec 2020. <https://www.inspq.qc.ca/covid-19/donnees>.
56. BC Centre for Disease Control. British Columbia COVID-19 daily situation report, June 9, 2020. 2020 2020 Jun 9. [http://www.bccdc.ca/Health-Info-Site/Documents/BC\\_Surveillance\\_Summary\\_June%20\\_9\\_2020.pdf](http://www.bccdc.ca/Health-Info-Site/Documents/BC_Surveillance_Summary_June%20_9_2020.pdf).
57. Lai CC, Wang JH, Ko WC, Yen MY, Lu MC, Lee CM, et al. COVID-19 in long-term care facilities: an upcoming threat that cannot be ignored. *J Microbiol Immunol Infect* 2020:Epub ahead of print.
58. Fisman D, Lapointe-Shaw L, Bogoch I, McCready J, Tuite A. Failing our most vulnerable: COVID-19 and long-term care facilities in Ontario [preprint]. *medRxiv* 2020.
59. CBC News. Lower income people, new immigrants at higher COVID-19 risk in Toronto, data suggests. CBC News. 2020 2020 May 12. Available from: <https://www.cbc.ca/news/canada/toronto/low-income-immigrants-covid-19-infection-1.5566384>.
60. News C. Toronto will start tracking race-based COVID-19 data, even if province won't. CBC. 2020 2020 Apr 22. Available from: <https://www.cbc.ca/news/canada/toronto/toronto-covid-19-race-based-data-1.5540937>.
61. CBC News. Toronto pushing province to start collecting and sharing COVID-19 data around race and jobs. CBC News. 2020 2020 Jun 2. Available from: <https://www.cbc.ca/news/canada/toronto/toronto-race-based-data-ontario-1.5594715>.
62. Yang J. Why COVID-19 outbreaks in hospitals are such a thorny issue. Toronto Star. 2020 2020 May 12. Available from: <https://www.thestar.com/news/canada/2020/05/12/why-are-covid-19-outbreaks-in-hospitals-such-a-thorny-issue.html>.
63. Government of Ontario. COVID-19 Directive #3 for Long-Term Care Homes under the LongTerm Care Homes Act, 2007 2020.
64. McGhie L, Barken R, Grenier A. Literature review: housing options for older homeless people. 2013. <https://aginghomelessness.com/wp-content/uploads/2012/10/Literature-Review-Housing-Options-for-Older-Homeless-People.pdf>.

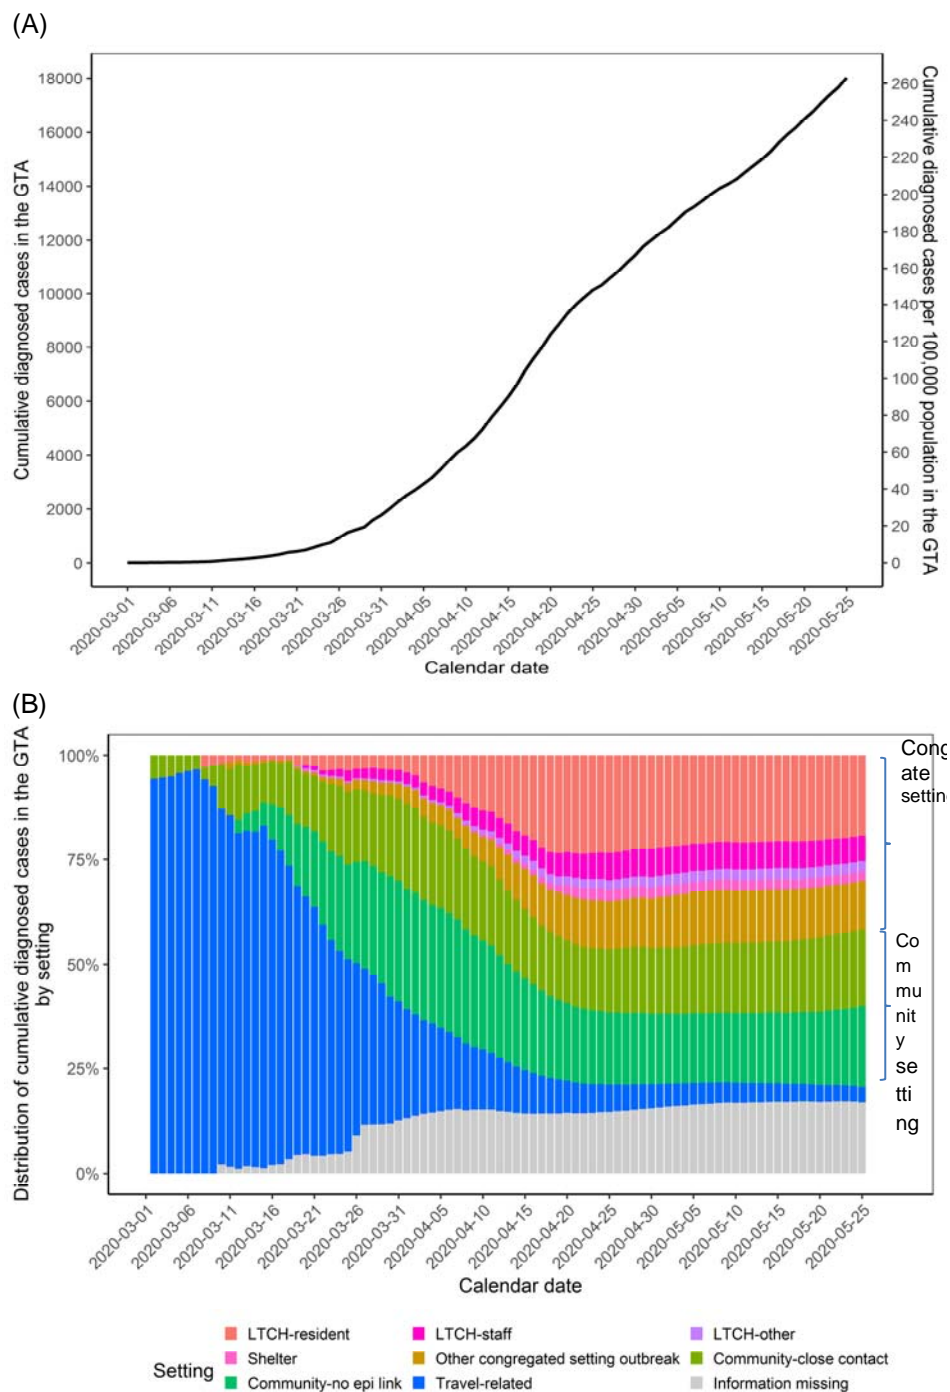

**Figure 1. The (A) total number and (B) distribution of cumulative diagnosed COVID-19 cases in the Greater Toronto Area by outbreak setting over time.** Settings are defined as mutually exclusive categories by the order shown in the graph (from top to bottom) in the event of multiple exposures. LTCH-other may include volunteers; other congregated outbreak settings include hospitals, correctional facilities, retirement homes, group homes, and other not yet classified such as workplaces. Information missing category excludes congregated setting. The calendar date refers to the date the case was reported to the public health unit. Data sources: iPHIS, the integrated Public Health Information System. Abbreviations: GTA, Greater Toronto Area; LTCH, long-term care homes.

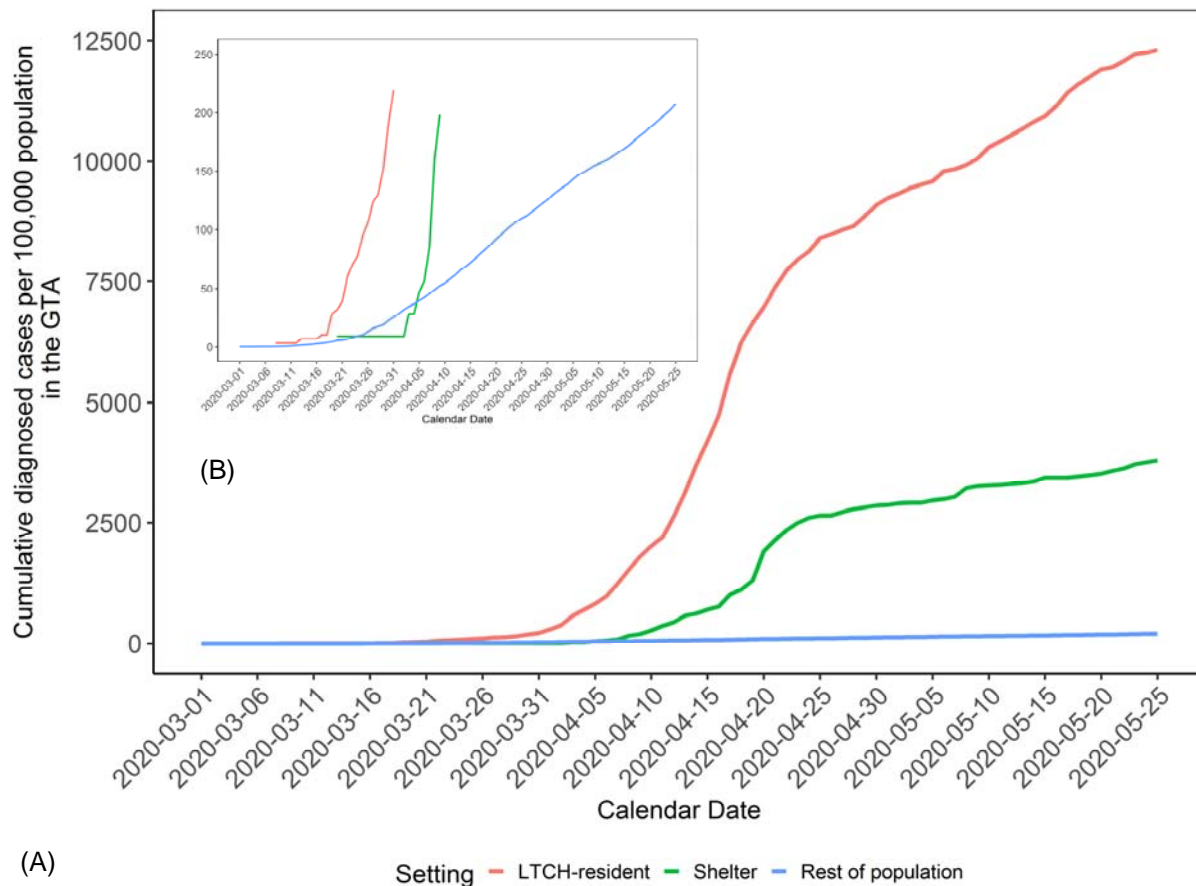

**Figure 2. (A) Comparison of cumulative diagnosed cases per capita over time by outbreak setting in the Greater Toronto Area. (B) has the same information as (A) but with different y-axis range.** The calendar date refers to the date the case was reported to the public health unit. Data sources: iPHIS, the integrated Public Health Information System. Abbreviations: GTA, Greater Toronto Area; LTCH, long-term care homes.



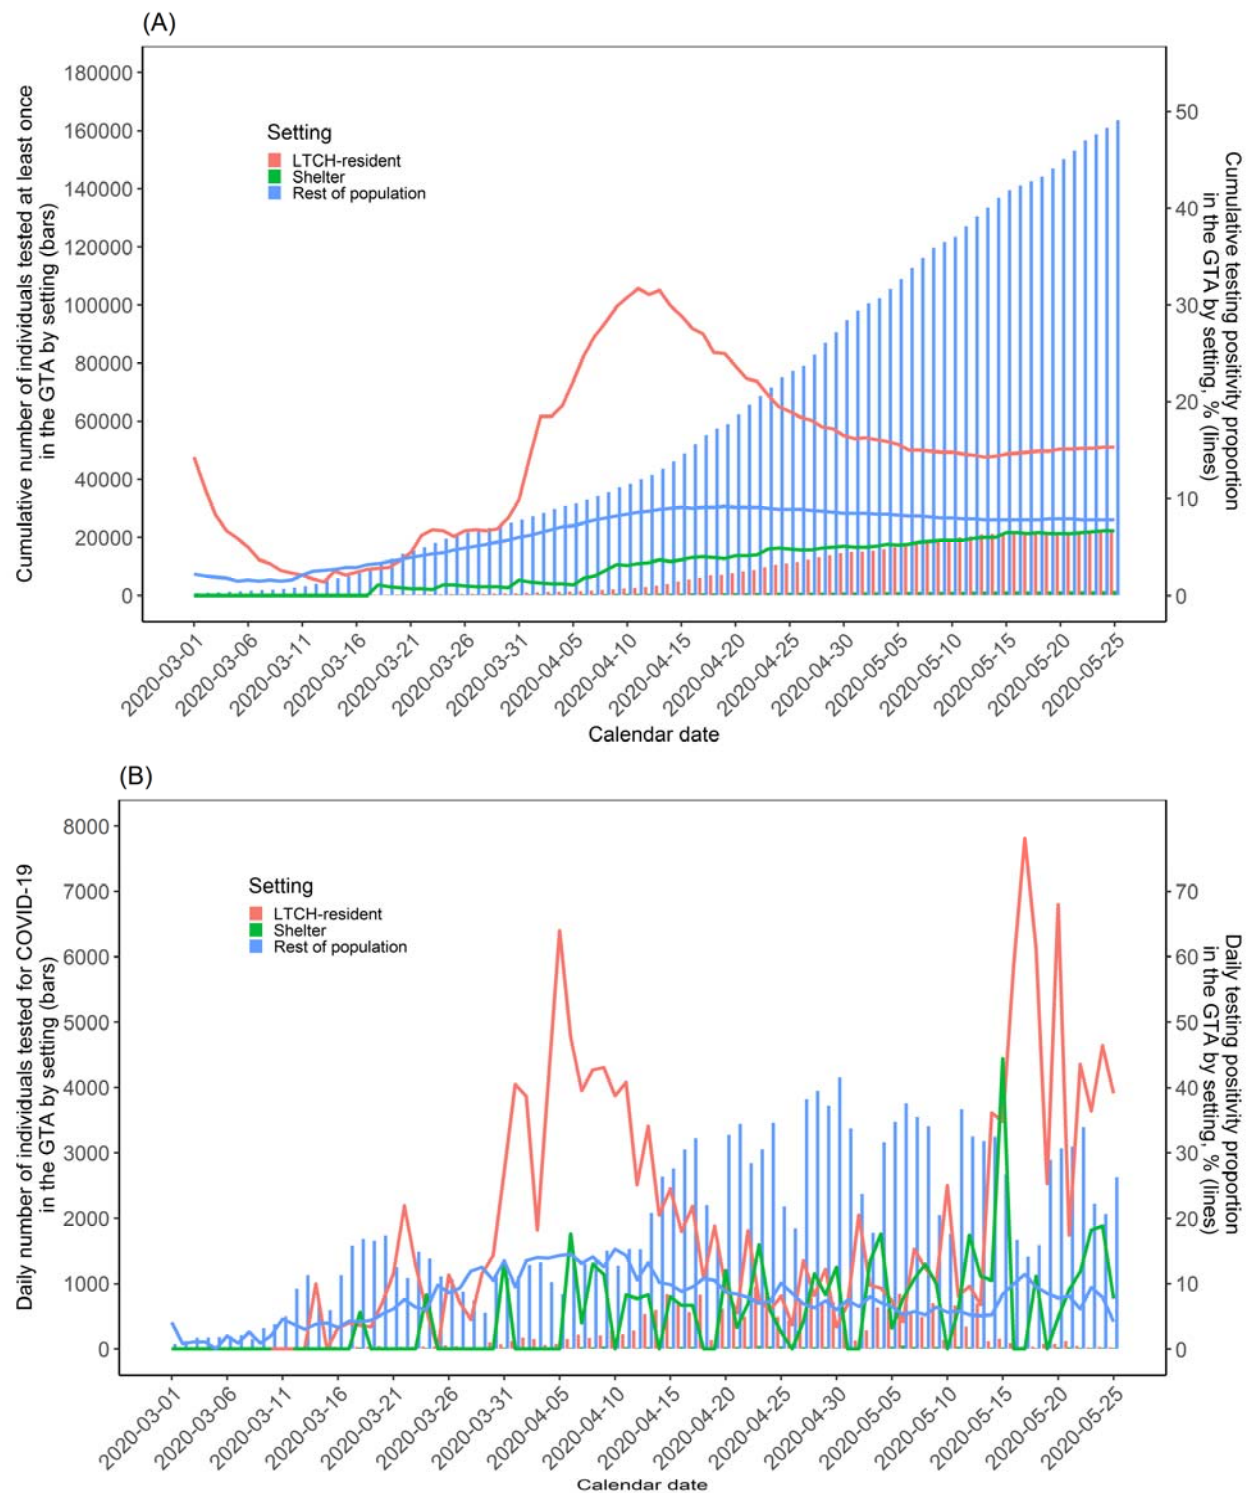

**Figure 3. Cumulative (A) and daily (B) number of individuals tested for COVID-19 and test positivity proportion over time by outbreak setting in the Greater Toronto Area.** The calendar date refers to the date when specimen was collected. Data sources: OLIS, the Ontario Laboratories Information System. Abbreviations: GTA, Greater Toronto Area; LTCH, long-term care homes.

**Table 1. Comparison across outbreak settings in the Greater Toronto Area regarding the cumulative risk of diagnosis, testing and case fatality of COVID-19 by May 25th, 2020.**

| Measures                                           | LTCH residents | Persons using shelters | The rest of the population | P-value** |
|----------------------------------------------------|----------------|------------------------|----------------------------|-----------|
| Population size*                                   | 28316          | 10588                  | 6808890                    |           |
| Number of diagnosed cases, overall                 | 3485           | 402                    | 14133                      |           |
| Female, N(%)***                                    | 2239 (66.4%)   | 165 (41.6%)            | 7473 (53.2%)               | <0.001    |
| Age, years, N(%)***                                |                |                        |                            | <0.001    |
| <50                                                | 20 (0.6%)      | 286 (71.3%)            | 7411 (52.4%)               |           |
| 50-59                                              | 50 (1.4%)      | 70 (17.5%)             | 2972 (21.0%)               |           |
| 60-69                                              | 197 (5.7%)     | 27 (6.7%)              | 1917 (13.6%)               |           |
| 70-79                                              | 613 (17.6%)    | 14 (3.5%)              | 818 (5.8%)                 |           |
| 80+                                                | 2605 (74.7%)   | 4 (1.0%)               | 1015 (7.2%)                |           |
| Number of individuals tested for COVID-19, overall | 21857          | 1477                   | 163476                     |           |
| Female, N(%)                                       | 14970 (68.5%)  | 420 (28.4%)            | 100629 (61.6%)             | <0.001    |
| Age, years, N(%)                                   |                |                        |                            | <0.001    |
| <50                                                | 171 (0.8%)     | 838 (56.7%)            | 83846 (51.3%)              |           |
| 50-59                                              | 519 (2.4%)     | 320 (21.7%)            | 30797 (18.8%)              |           |
| 60-69                                              | 1613 (7.4%)    | 208 (14.1%)            | 20399 (12.5%)              |           |
| 70-79                                              | 3624 (16.6%)   | 76 (5.1%)              | 11502 (7%)                 |           |
| 80+                                                | 15930 (72.9%)  | 35 (2.4%)              | 16932 (10.4%)              |           |
| Number of deaths among diagnosed cases, overall    | 915            | 3                      | 506                        |           |
| Female, N(%)                                       | 530 (59.7%)    | 0 (0%)                 | 210 (41.5%)                | <0.001    |
| Age, years, N(%)                                   |                |                        |                            | <0.001    |
| <50                                                | 0 (0%)         | 0 (0%)                 | 21 (4.2%)                  |           |
| 50-59                                              | 7 (0.8%)       | 2 (66.7%)              | 40 (7.9%)                  |           |
| 60-69                                              | 35 (3.8%)      | 0 (0%)                 | 80 (15.8%)                 |           |
| 70-79                                              | 132 (14.4%)    | 1 (33.3%)              | 118 (23.3%)                |           |
| 80+                                                | 741 (81%)      | 0 (0%)                 | 247 (48.8%)                |           |
| Diagnosed cases per 100,000                        |                |                        |                            |           |
| Absolute value                                     | 12308          | 3797                   | 208                        |           |
| Relative value                                     | 59.2           | 18.3                   | Reference                  |           |
| Proportion of population tested for COVID-19, %    |                |                        |                            |           |

|                                                               |               |               |           |  |
|---------------------------------------------------------------|---------------|---------------|-----------|--|
| Absolute value                                                | 77.2          | 13.9          | 2.4       |  |
| Relative value                                                | 32.2          | 5.8           | Reference |  |
| Proportion of tests with positive results, %                  |               |               |           |  |
| Absolute value                                                | 15.3          | 4.8           | 6.7       |  |
| Relative value                                                | 2.3           | 0.7           | Reference |  |
| Age- and sex-adjusted test positivity rate ratio (95% CI)**** | 2.5 (2.3-2.8) | 0.8 (0.5-1.1) | Reference |  |
| P-value                                                       | < 0.001       | 0.036         | Reference |  |
| Case fatality proportion                                      |               |               |           |  |
| Absolute value                                                | 26.3          | 0.7           | 3.6       |  |
| Relative value                                                | 7.3           | 0.2           | Reference |  |
| Age- and sex-adjusted case fatality rate ratio (95% CI)****   | 1.4 (1.1-1.9) | 0.6 (0 - 3.3) | Reference |  |
| P-value                                                       | 0.028         | 0.65          | Reference |  |

Abbreviations: LTCH, long-term care home; CI: confidence intervals.

\*LTCH residents population size approximated by the total LTCH bed capacity in the Greater Toronto Area; persons using shelters population size approximated by the estimated number of people experiencing homelessness in the Greater Toronto Area (Appendix-2); the rest of the population size estimated by the total census population size of subtracting population size of LTCH residents and persons using shelters.

\*\*Comparison using Chi-squared tests.

\*\*\*Of 18020 diagnosed cases, 206 had unknown sex, and 1 had unknown age; age and sex distribution proportions based on non-missing information.

\*\*\*\*Estimated using quasipoisson regression models, adjusting for age and sex.
